# Supplementary material
Source: Springer Nature journal article supplement (https://www.springermedizin.de/resource/supplementary/13014_2012_799_MOESM6_ESM.pdf/9634536)

# Progression Free Survival

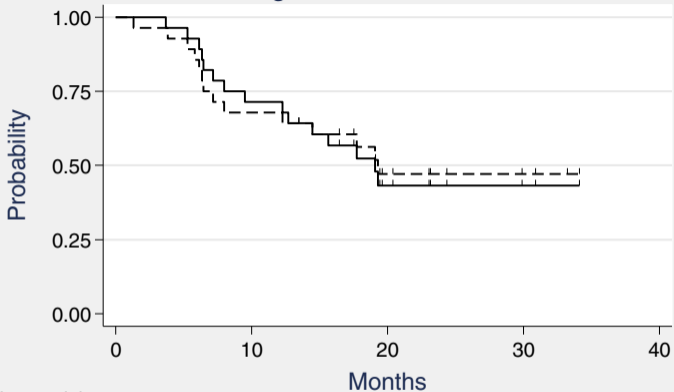

| Number at risk    |    |    |   |   |   |   |
|-------------------|----|----|---|---|---|---|
| Combined criteria | 28 | 20 | 7 | 2 | 0 | 0 |
| RECIST            | 28 | 19 | 8 | 3 | 0 | 0 |

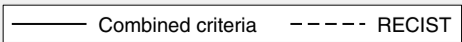

Supplement: MOESM6 [file 9634536]
